# Supplementary material for: Additional effect of the coagulation process on removal of tetracycline from characteristically simulated livestock and poultry wastewater
Source: Royal Society of Chemistry journal article supplement (doi:10.1039/d5ew00890e), 2026-01-01
Supplement: d5ew00890e1.pdf [file d5ew00890e1.pdf]

## Supplementary Material

Additional effect of coagulation process on removal of tetracycline in  
characteristically simulated livestock and poultry wastewater

Wei Congjian<sup>a,\*</sup>, Zu Yilin<sup>b,\*</sup>, Hao Yang<sup>c</sup>, Han Zhang<sup>a,\*\*</sup>

<sup>a</sup> *Key Laboratory for Water Quality and Conservation of the Pearl River Delta, Ministry of Education, Institute of Environmental Research at Greater Bay, Guangzhou University, Guangzhou 510006, China*

<sup>b</sup> *School of Chemical Engineering, The University of Queensland, St. Lucia, QLD, 4072, Australia*

<sup>c</sup> *Key Lab of Groundwater Resources and Environment (Ministry of Education), College of New energy and Environment, Jilin University, Changchun 130021, China*

\*These authors contributed equally: Wei Congjian and Zu Yilin (co-first authors)

\*\* Corresponding author: Zhang Han

Email: zhanghan@gzhu.edu.cn

- **Supplementary Figures**

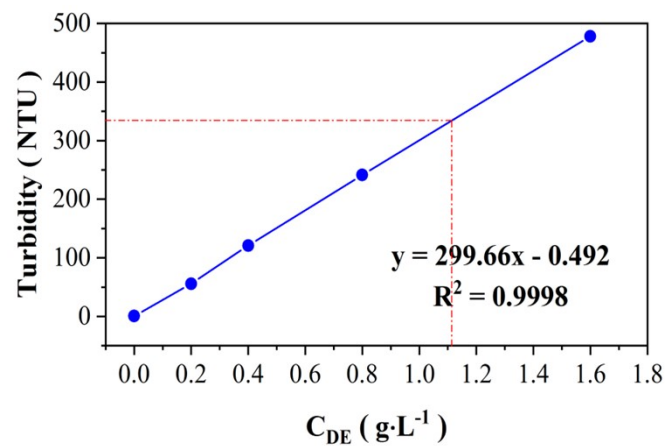

**Figure S1** Relationship between diatomite concentration and turbidity.

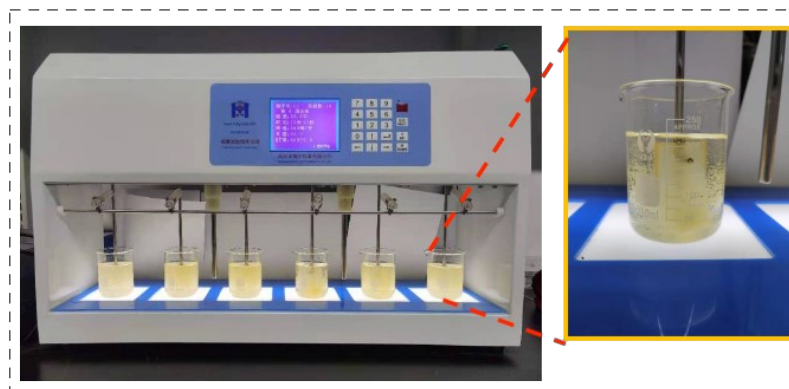

**Figure S2** Experimental instrument- sequencing batch coagulation instrument

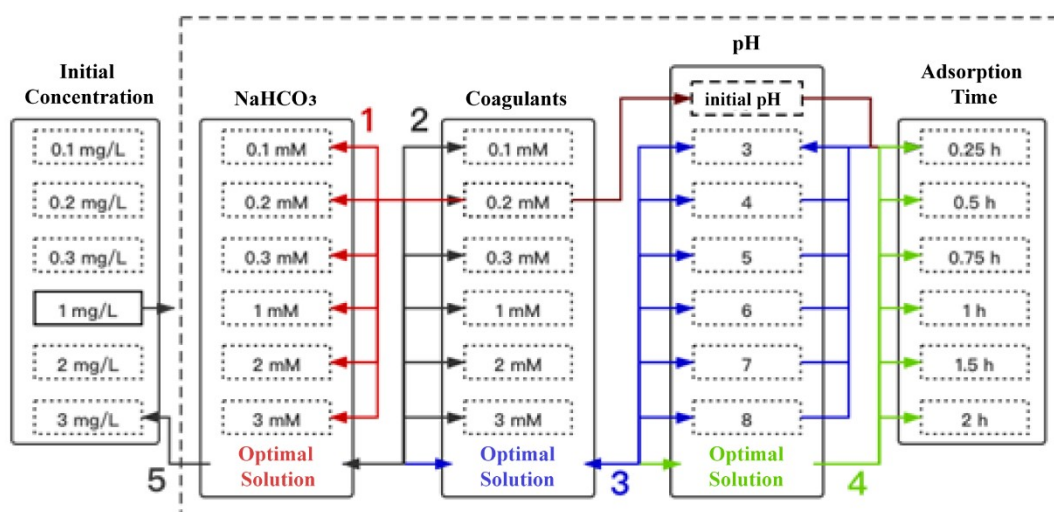

**Figure S3** Specific experimental scheme

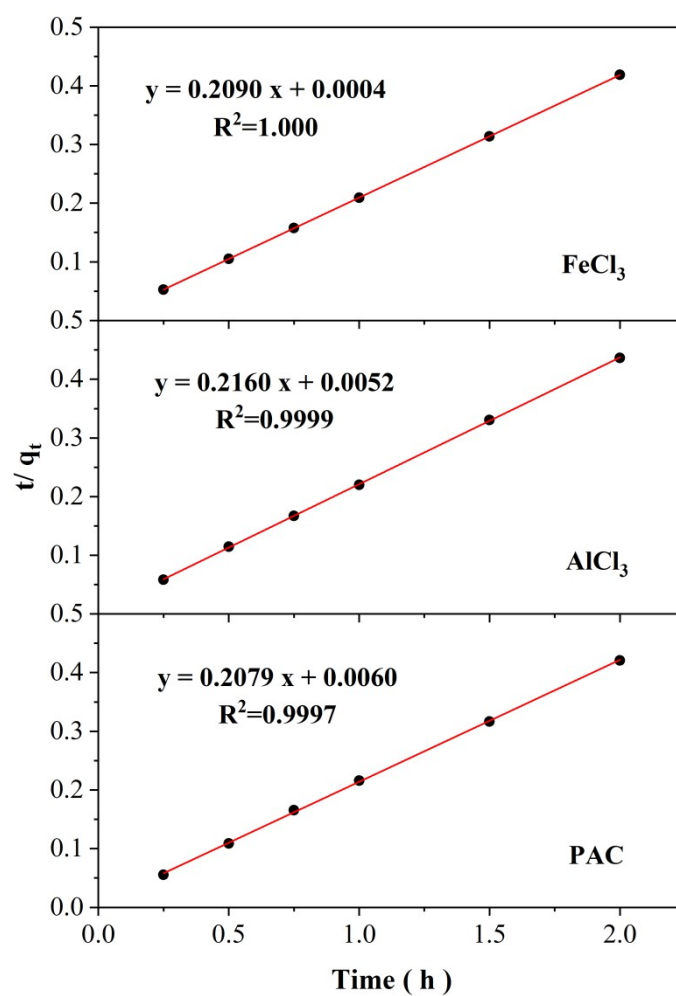

**Figure S4** Quasi-second order kinetics model fitting of three coagulants for tetracycline adsorption

● **Supplementary Tables**

**Table S1** Setup of coagulation process steps

| Stage               | Time (min) | Rotation rate (rpm) | Agentia | G (s <sup>-1</sup> ) |
|---------------------|------------|---------------------|---------|----------------------|
| Blending            | 0.5        | 250                 | √       | 349.5                |
| Drugging            | 1          | 0                   |         |                      |
| Mixed rapidly       | 2          | 200                 |         | 250                  |
| Flocculation slowly | 15         | 40                  |         | 22.3                 |
| Sedimentation       | 30         | 0                   |         |                      |

**Table S2** The mineral crystals and content of pure flocs of different coagulants produce

| Coagulant         | Mineral crystal content (%) |      |           |          |
|-------------------|-----------------------------|------|-----------|----------|
|                   | Allophane                   | Opal | Tridymite | Hematite |
| FeCl <sub>3</sub> | 2.6                         | 89.4 | 7.0       | 1.0      |
| AlCl <sub>3</sub> | 2.7                         | 90.3 | 7.0       | /        |
| PAC               | 2.9                         | 90.1 | 7.0       | /        |
